## **Retraction: Androgen receptor CAG and GGN repeat length variation contributes more to the tumorigenesis of osteosarcoma**

**Yongxiang Shi, Weishan Chen, Qinghuai Li, Zhaoming Ye**

Copyright: Shi, et al. This is an open-access article distributed under the terms of the Creative Commons Attribution License (CC-BY), which permits unrestricted use, distribution, and reproduction in any medium, provided the original author and source are credited.

**Present:** Due to the authors' negligence during the preparation of this manuscript for submission, it contains a plethora of data errors. Authors sincerely apologize for their mistakes and wish to retract their manuscript.

**Correct:** The online version of the original article can be found under doi.

Original article: Oncotarget. 2016; 7:68151-68155. doi: 10.18632/oncotarget.11902
